# Supplementary material for: The plasma metabolome of women in early pregnancy differs from that of non-pregnant women
Source: PubMed Central journal article supplement (PMC6855901; doi:10.1371/journal.pone.0224682), 2019-11-14

A

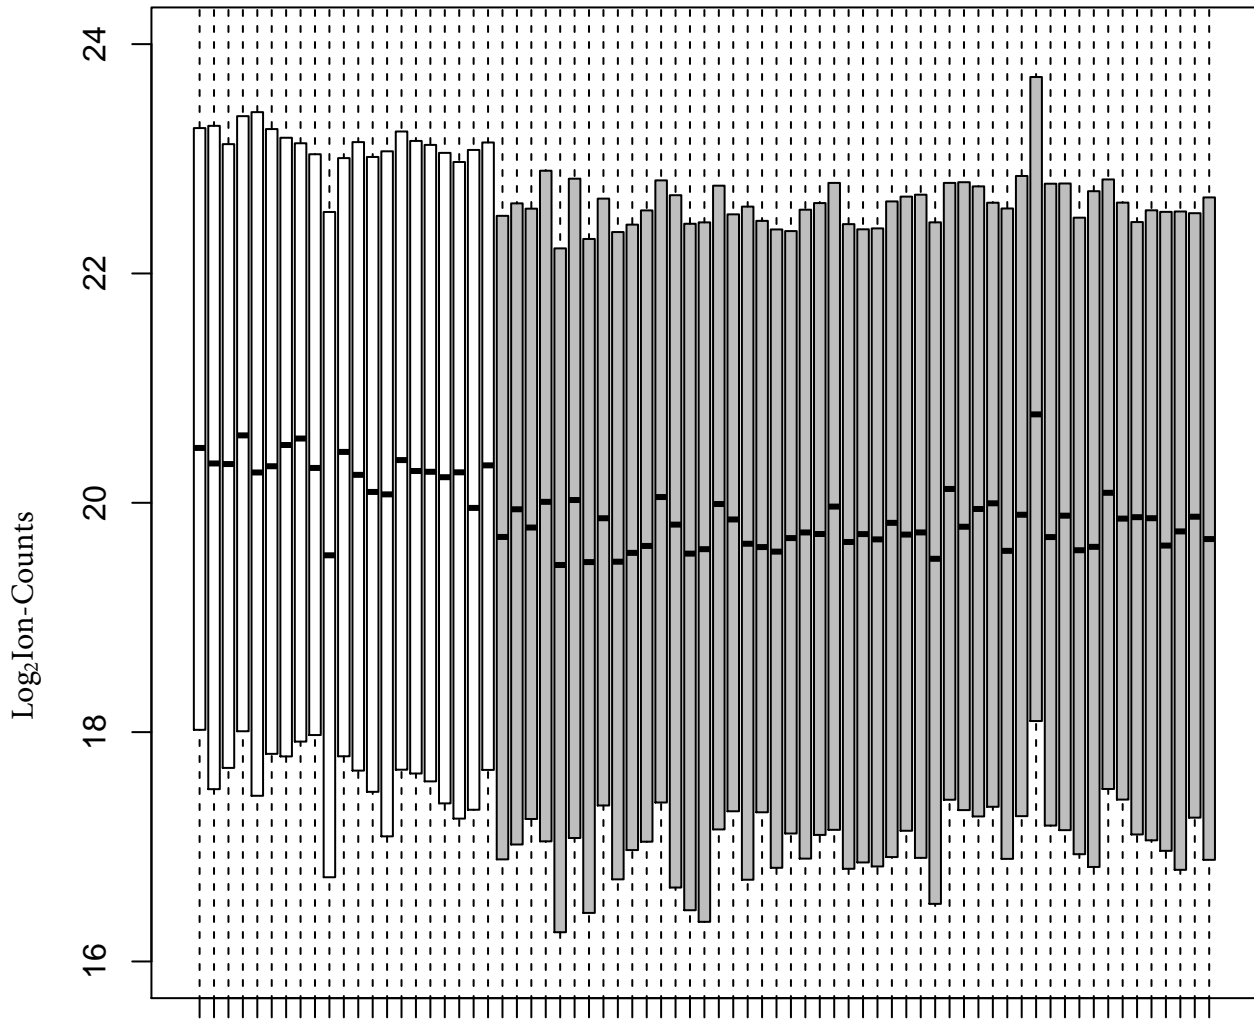

**B**

Individual Patient Median Metabolite Abundance

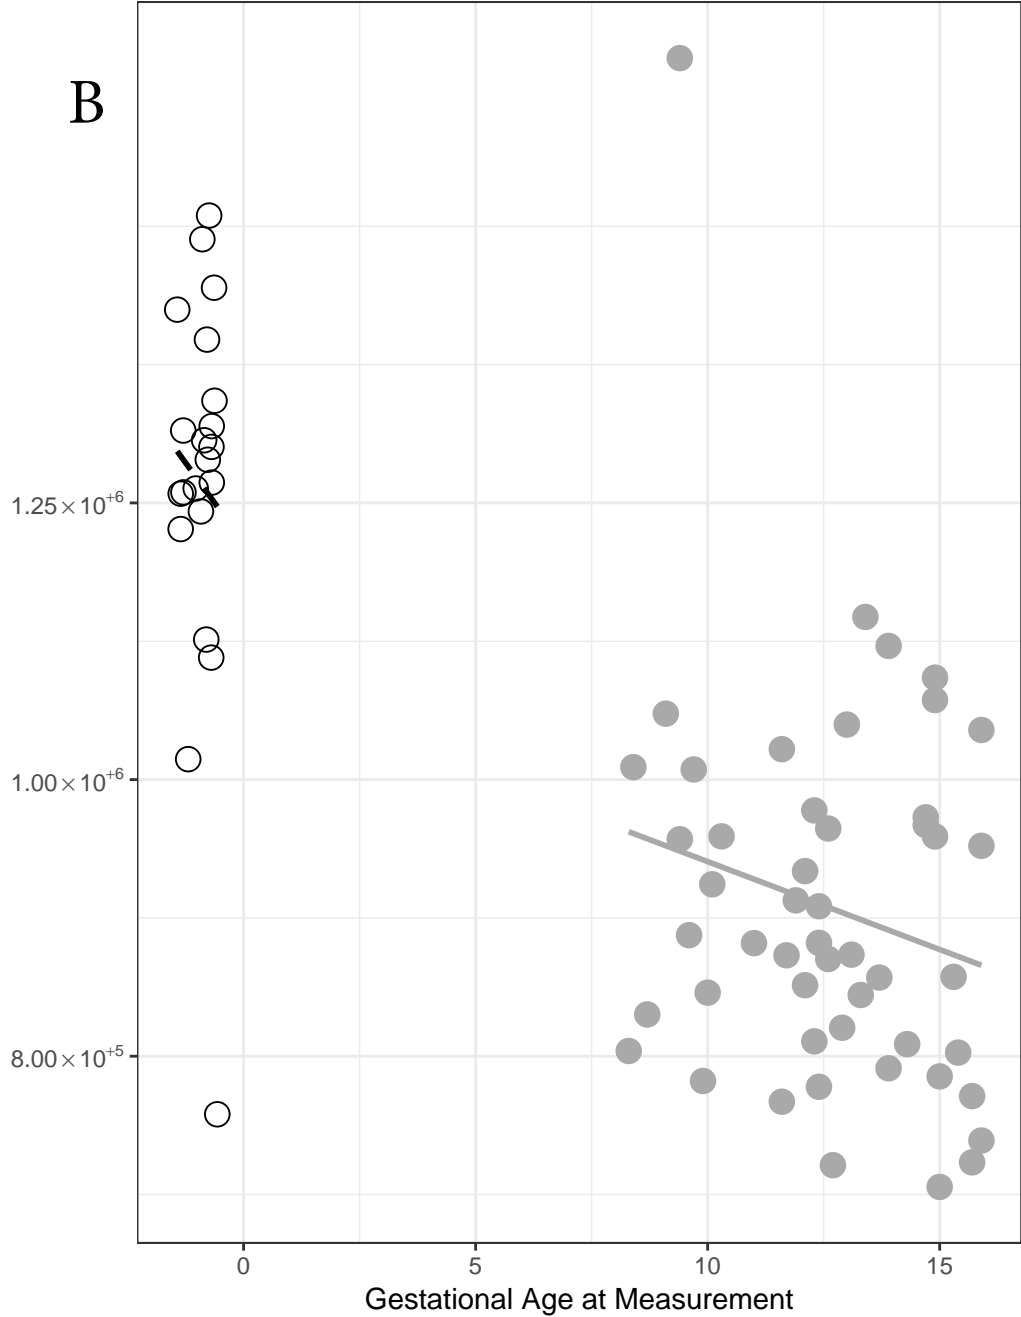

Group

● Non-Pregnant

● Pregnant

Log<sub>2</sub>Ion-Counts

16 18 20 22 24

C

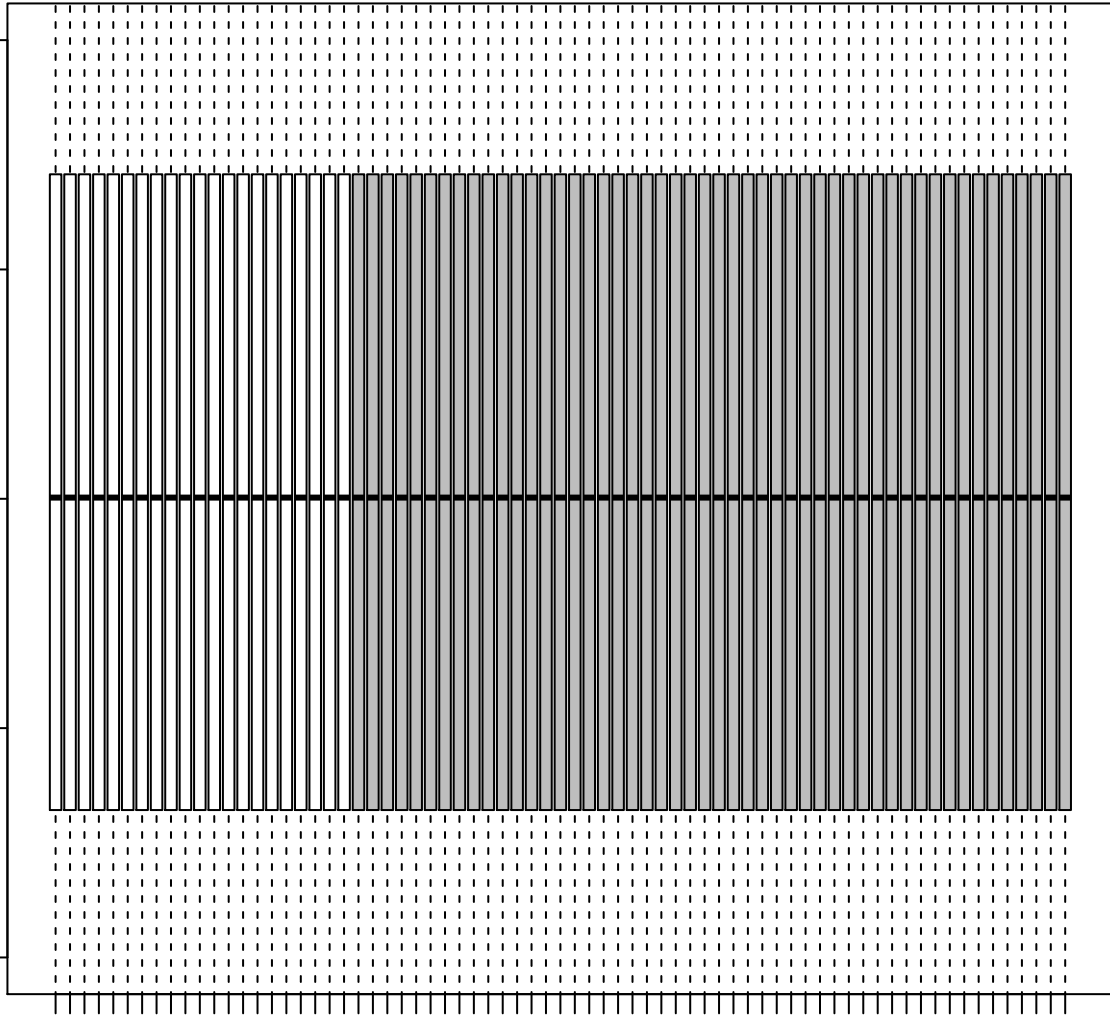

D

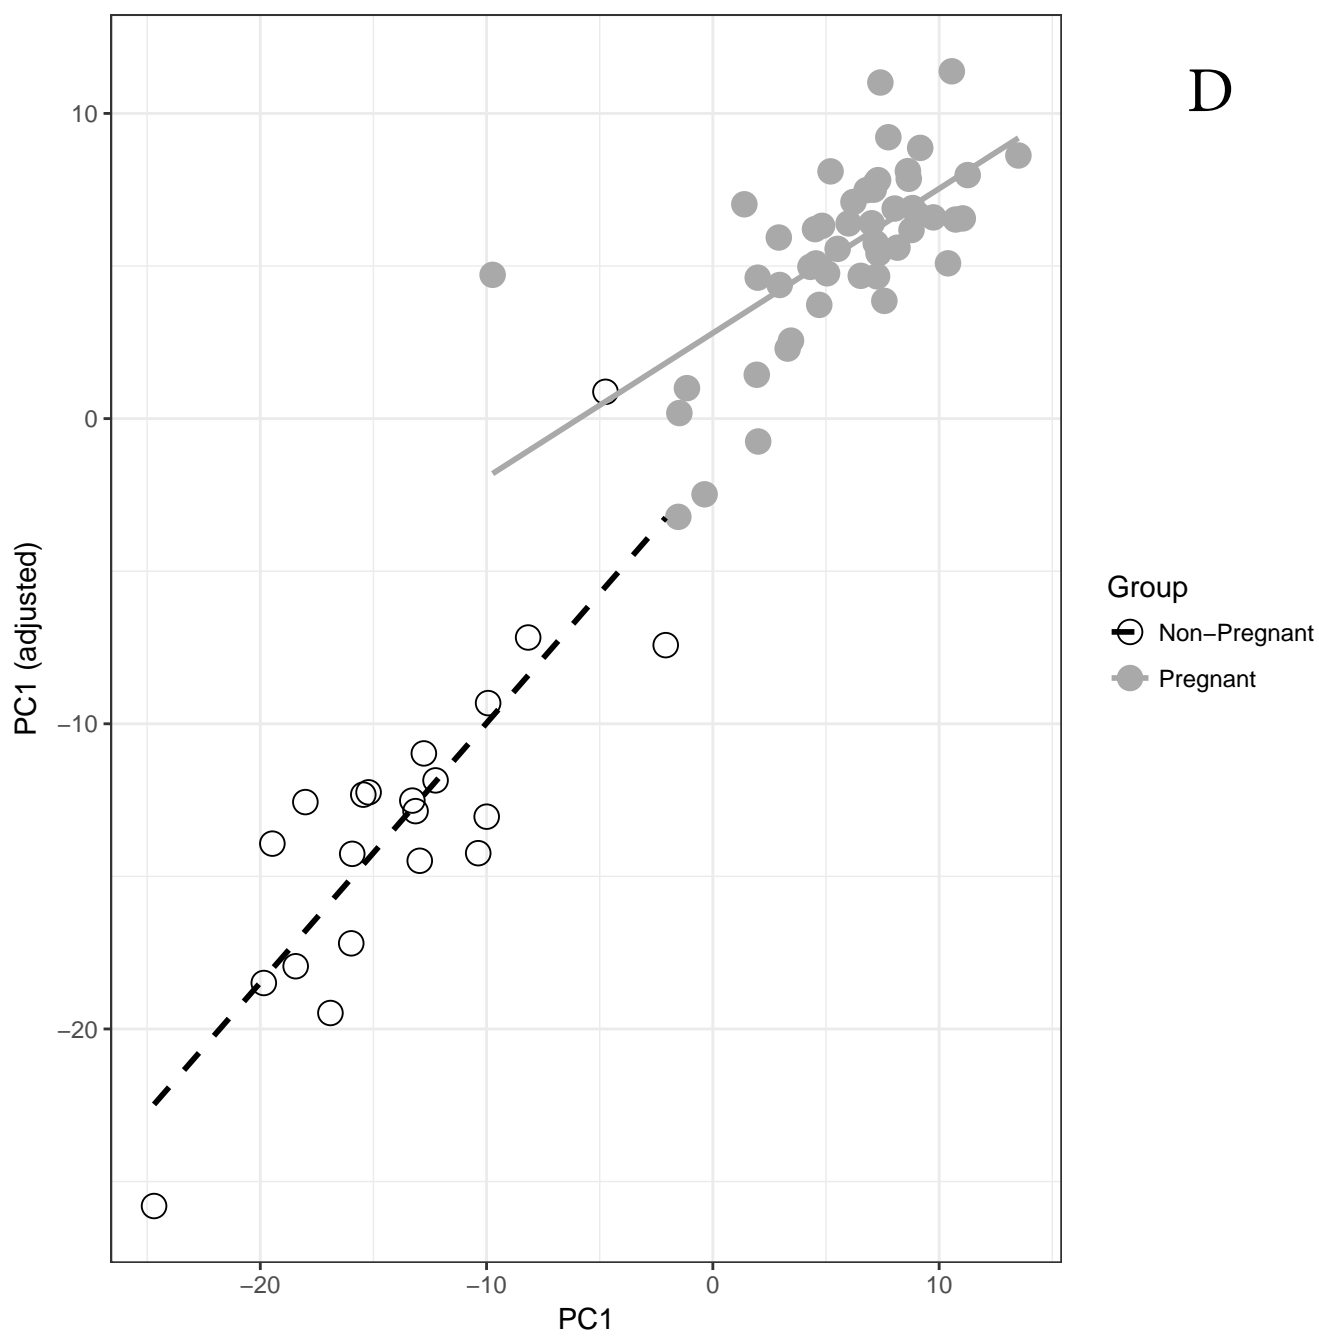

Supplement: pone.0224682.s004.pdf [file pone.0224682.s004.pdf]
