# Supplementary material for: The plasma metabolome of women in early pregnancy differs from that of non-pregnant women
Source: PubMed Central journal article supplement (PMC6855901; doi:10.1371/journal.pone.0224682), 2019-11-14

0.0 0.2 0.4 0.6 0.8 1.0

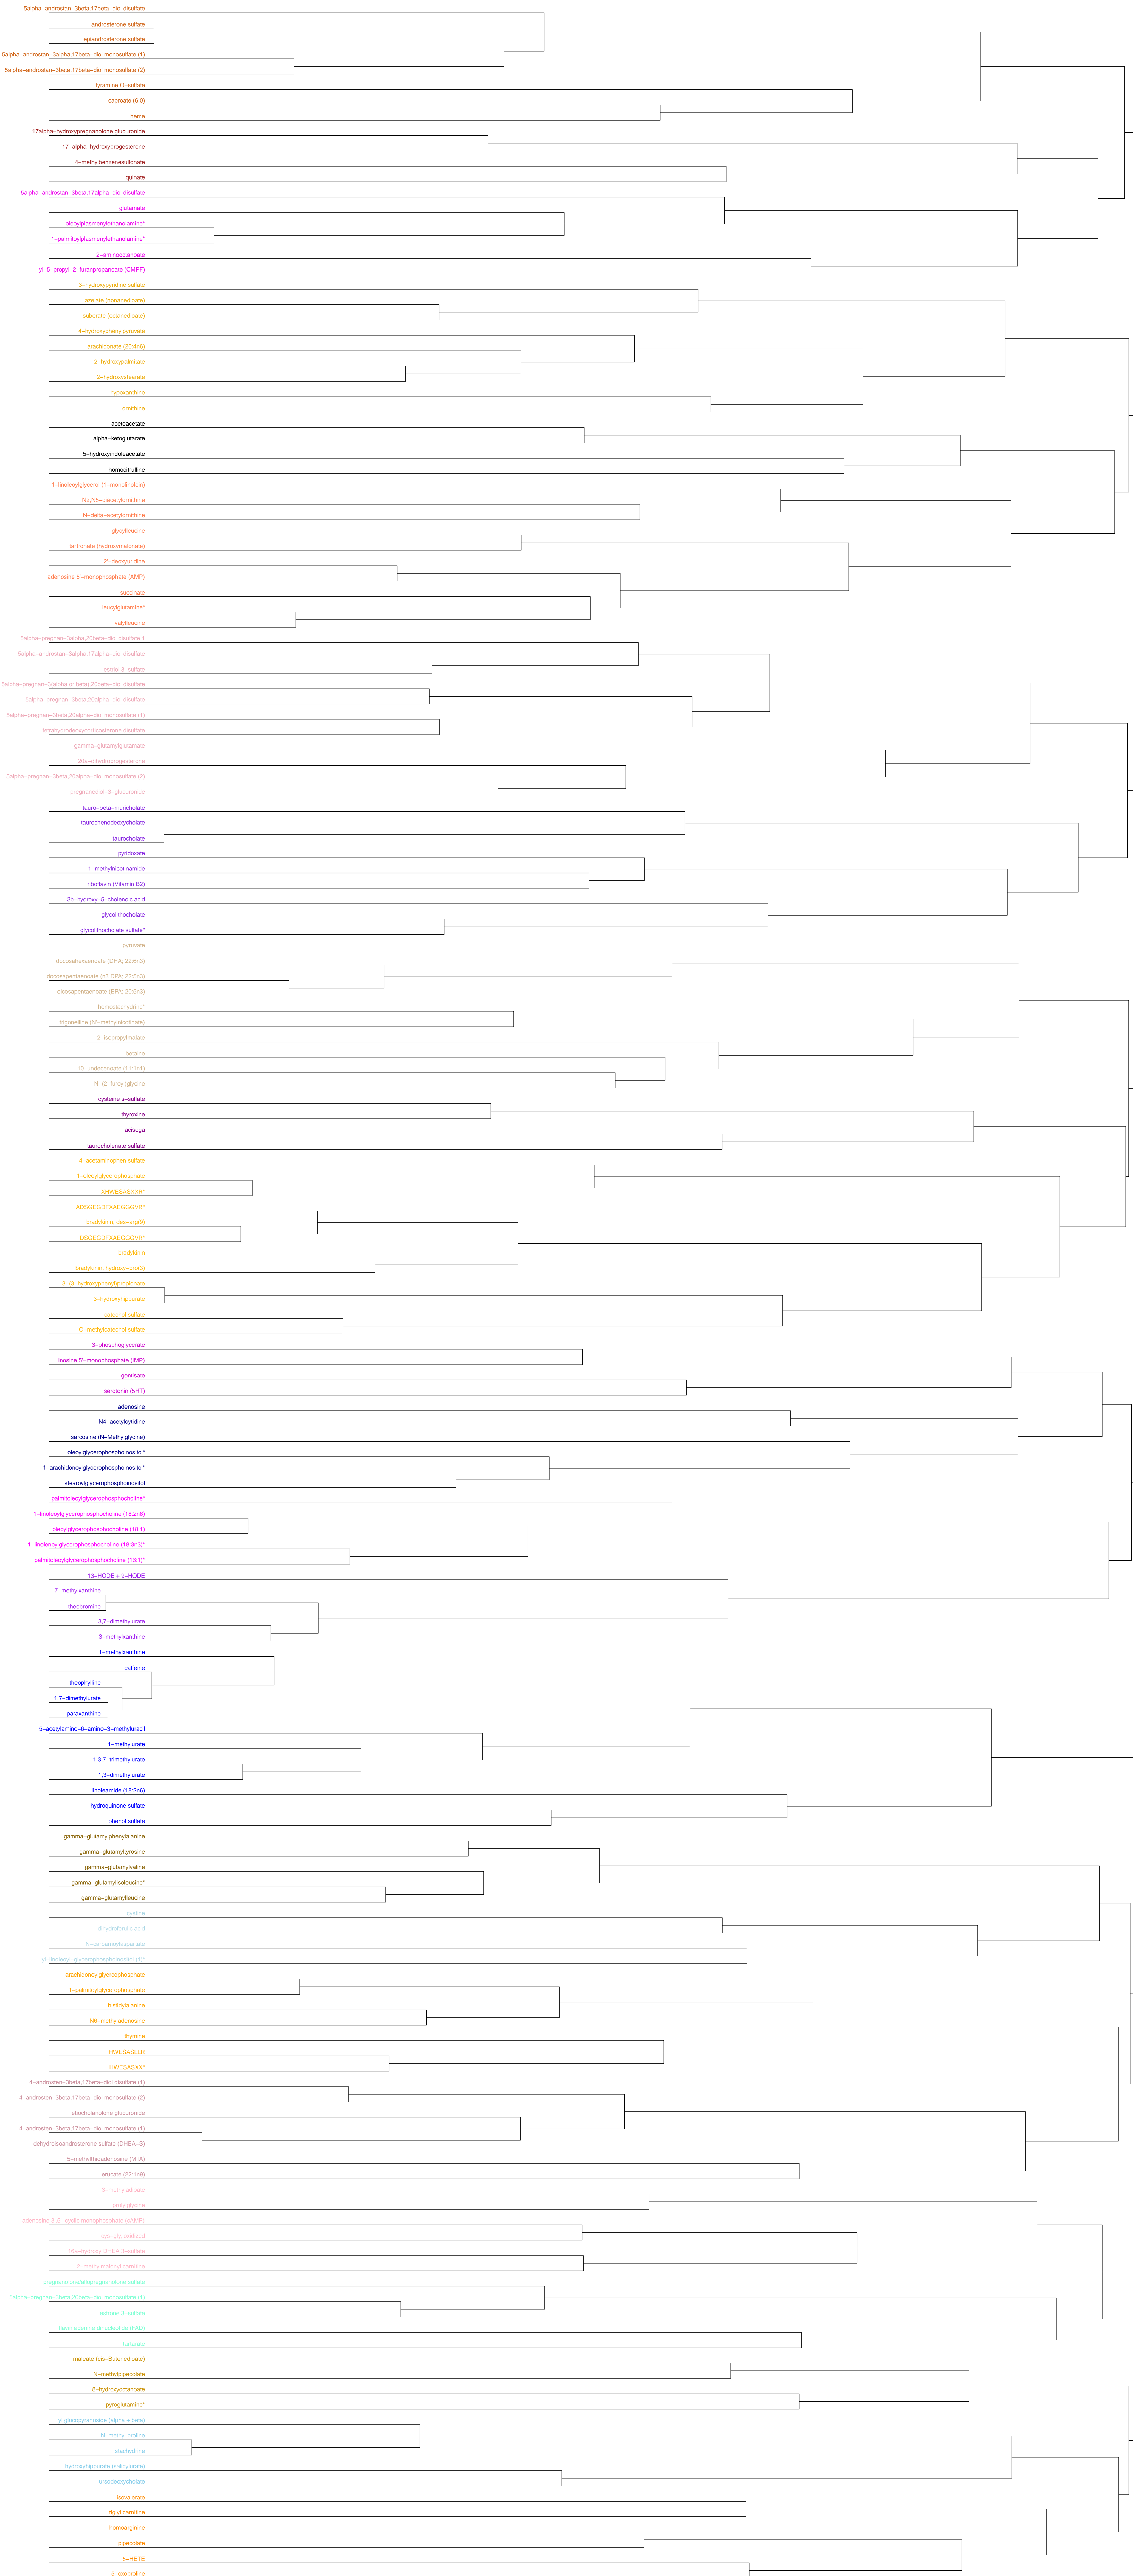

Supplement: pone.0224682.s005.pdf [file pone.0224682.s005.pdf]
