# Supplementary material for: The plasma metabolome of women in early pregnancy differs from that of non-pregnant women
Source: PubMed Central journal article supplement (PMC6855901; doi:10.1371/journal.pone.0224682), 2019-11-14

A

Adjusted valine

Adjusted  $\gamma$ GluVal

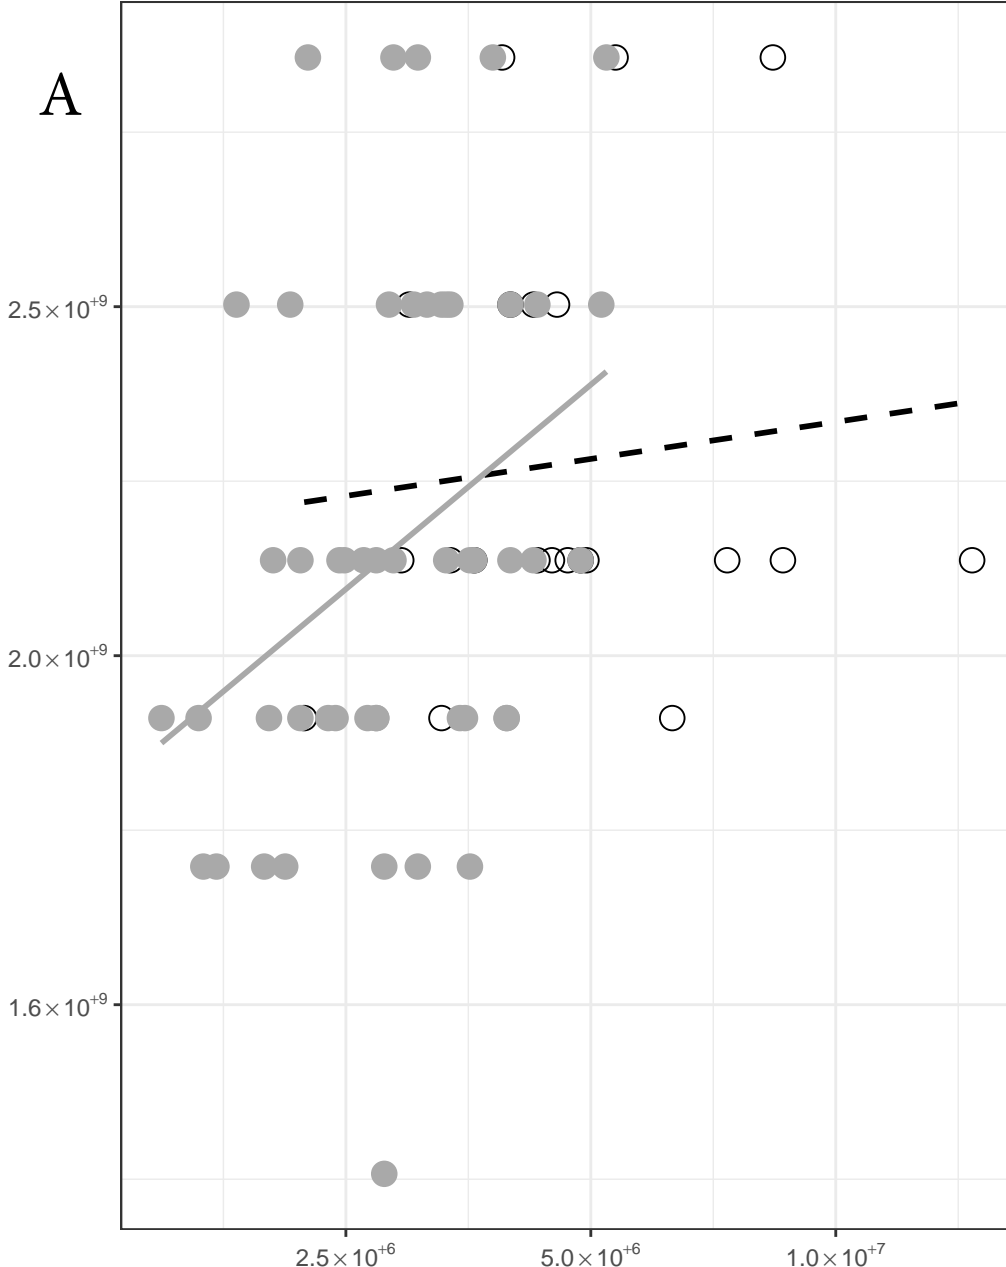

Group

○ Non-Pregnant

● Pregnant

**B**

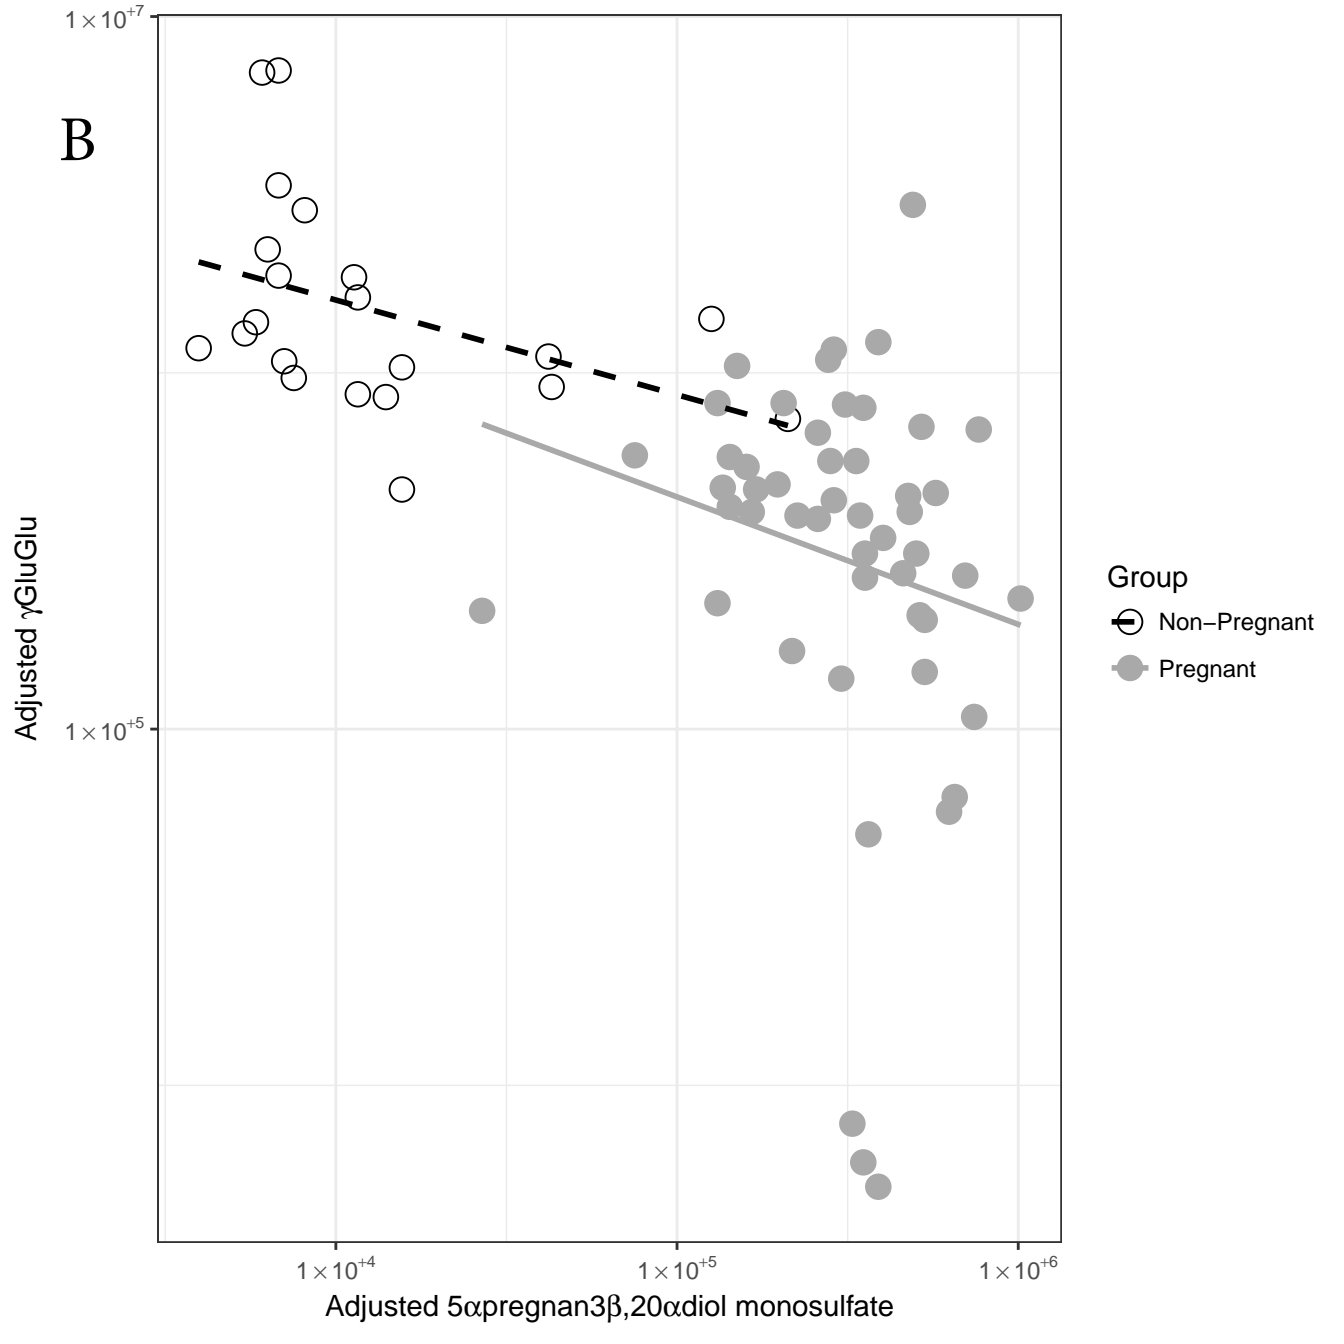

**C**

Adjusted cyclic AMP

Adjusted CysGly, oxidized

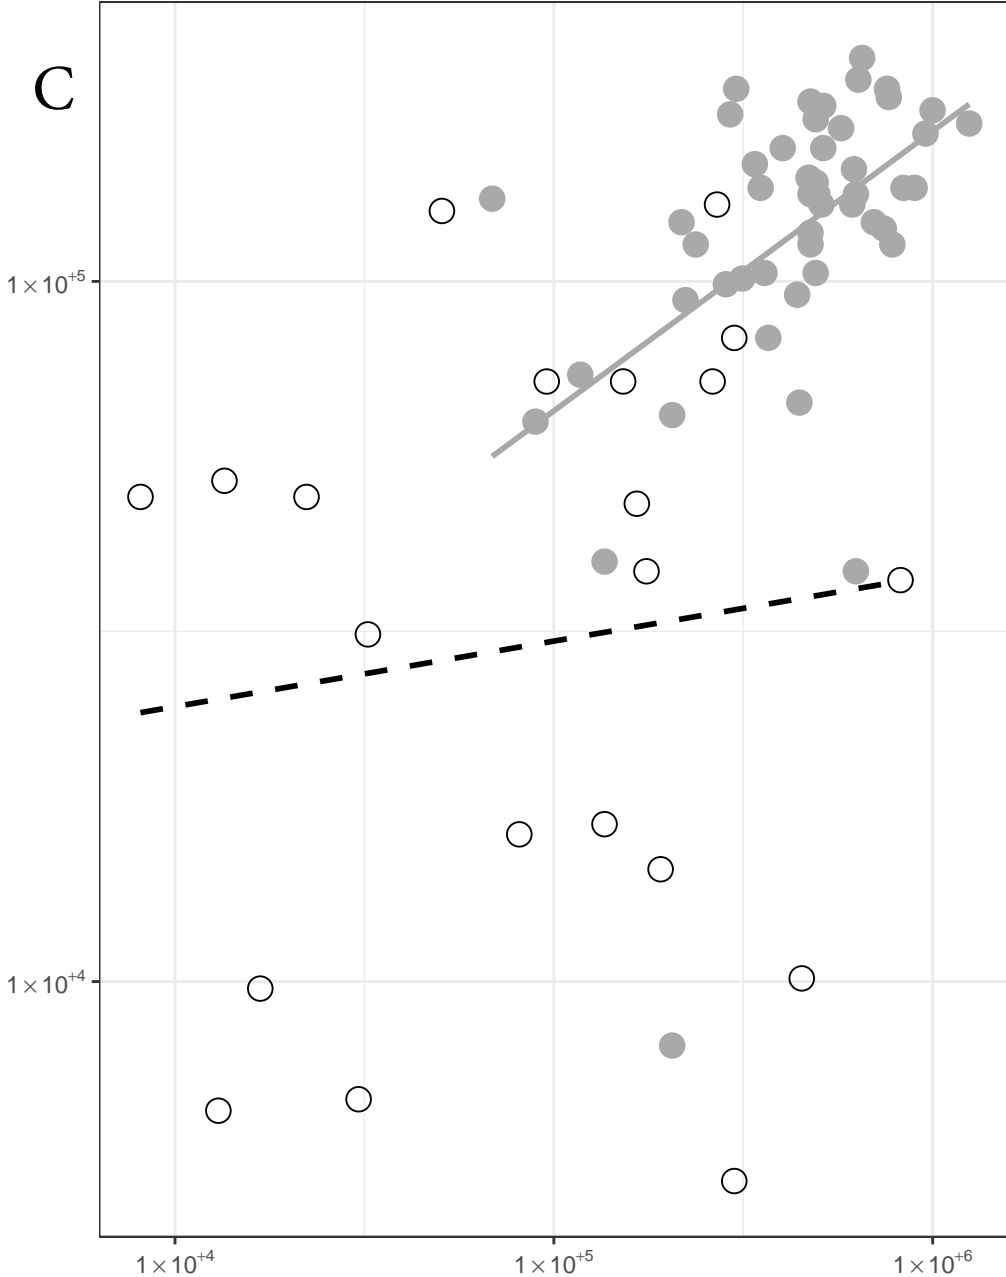

Group

○ Non-Pregnant

● Pregnant

D

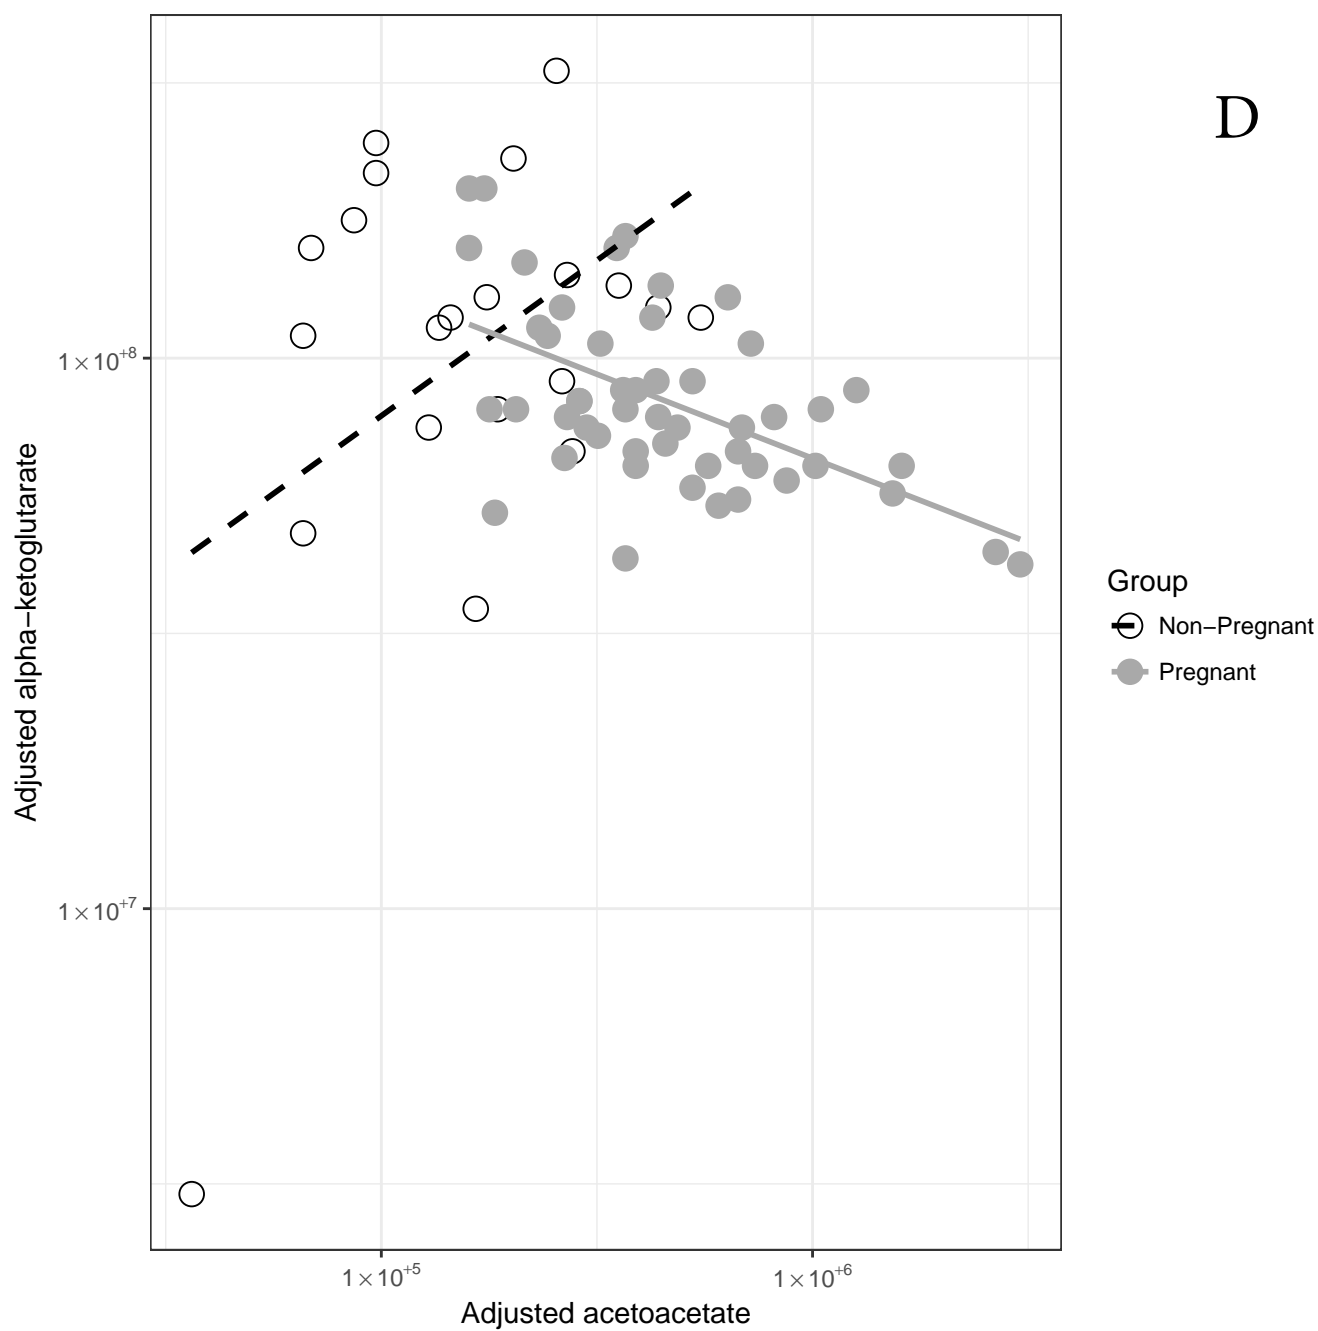

Supplement: pone.0224682.s006.pdf [file pone.0224682.s006.pdf]
