# Supplementary material for: The plasma metabolome of women in early pregnancy differs from that of non-pregnant women
Source: PubMed Central journal article supplement (PMC6855901; doi:10.1371/journal.pone.0224682), 2019-11-14
Supplement: pone.0224682.s007.pdf [file pone.0224682.s007.pdf]

5 $\alpha$ pregnan3 $\beta$ ,20 $\beta$ diol monosulfate

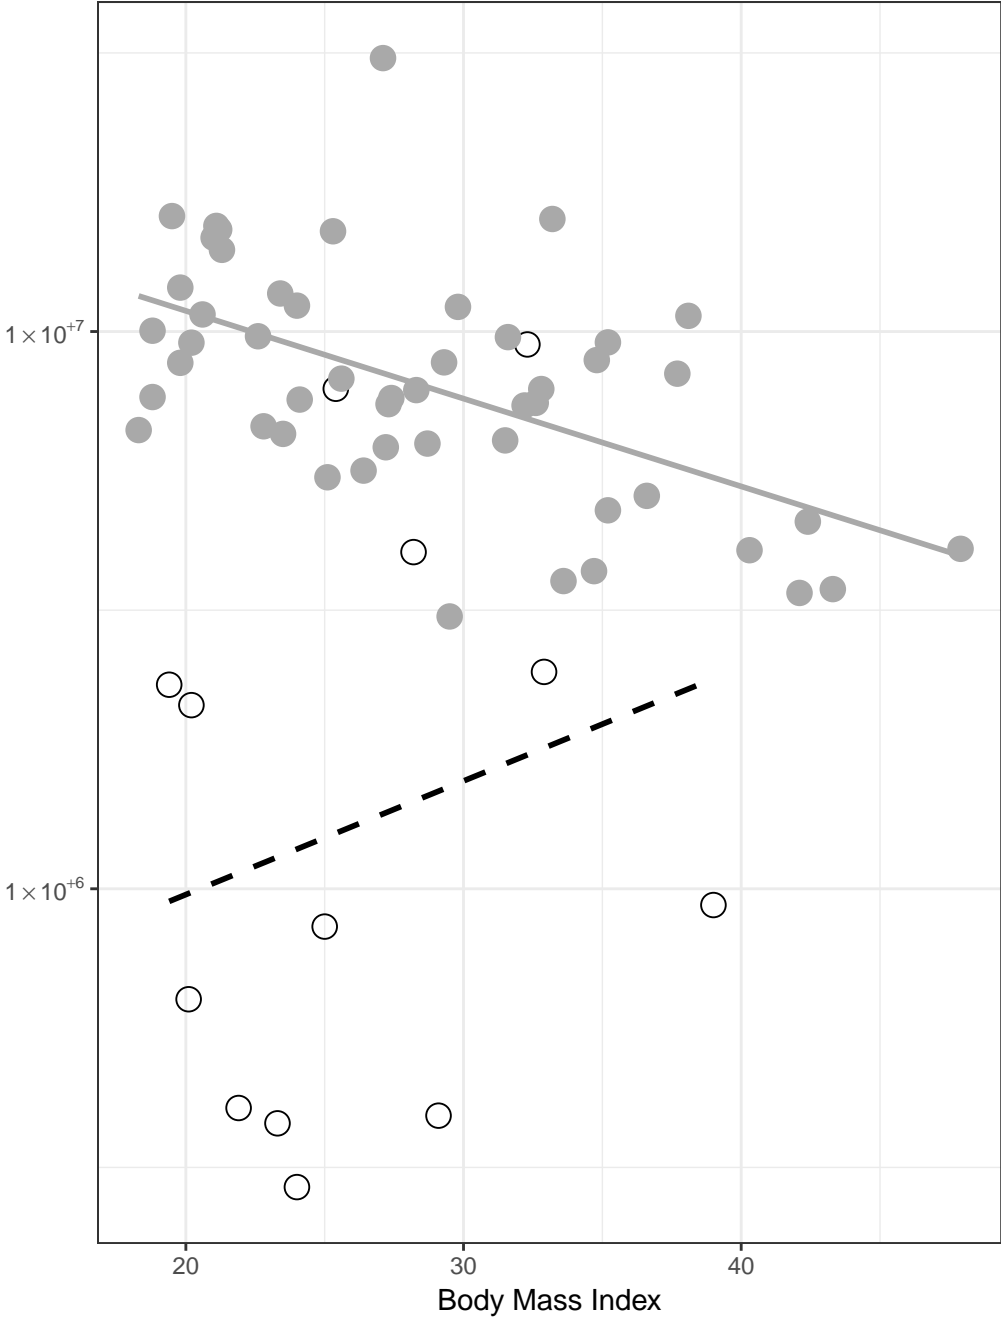

Group  
○ Non-Pregnant  
● Pregnant
