# Supplementary material for: The plasma metabolome of women in early pregnancy differs from that of non-pregnant women
Source: PubMed Central journal article supplement (PMC6855901; doi:10.1371/journal.pone.0224682), 2019-11-14

# A) Steroid Network

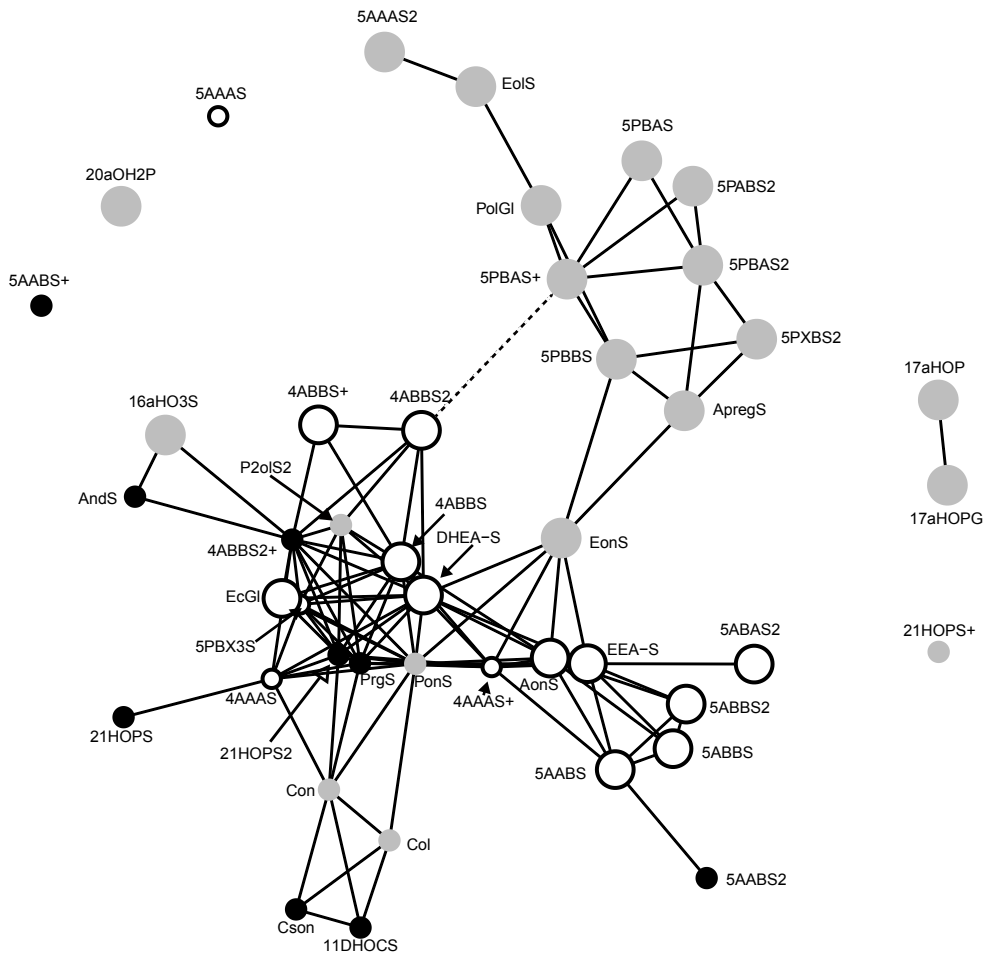

# Lysolipid Network

B)

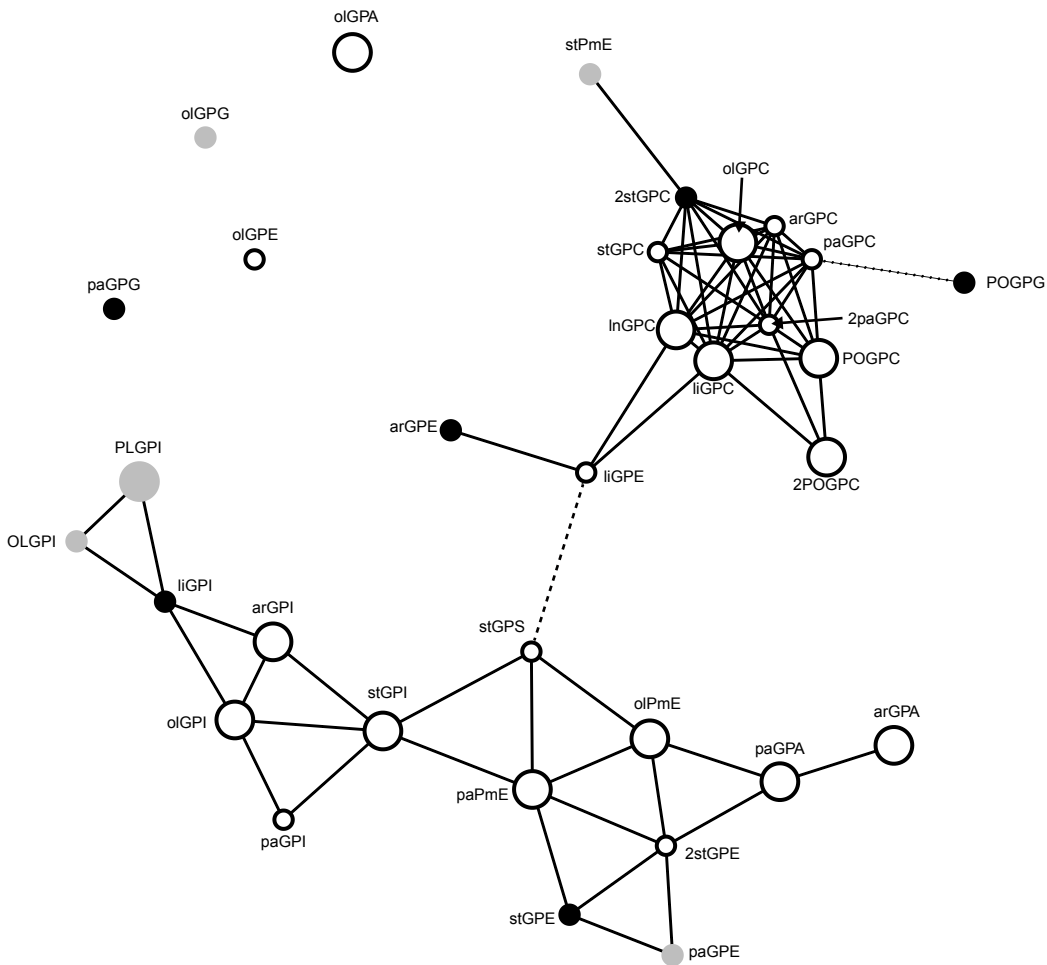

# Dipeptide Network

C)

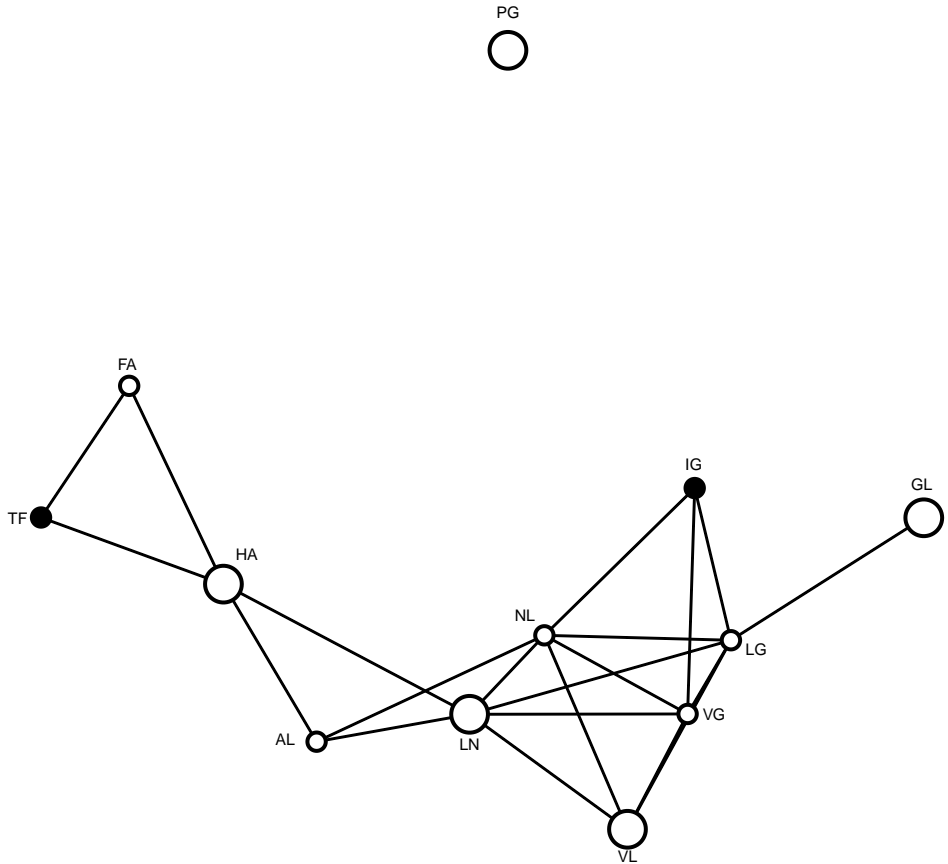

# Bradykinin Network

D)

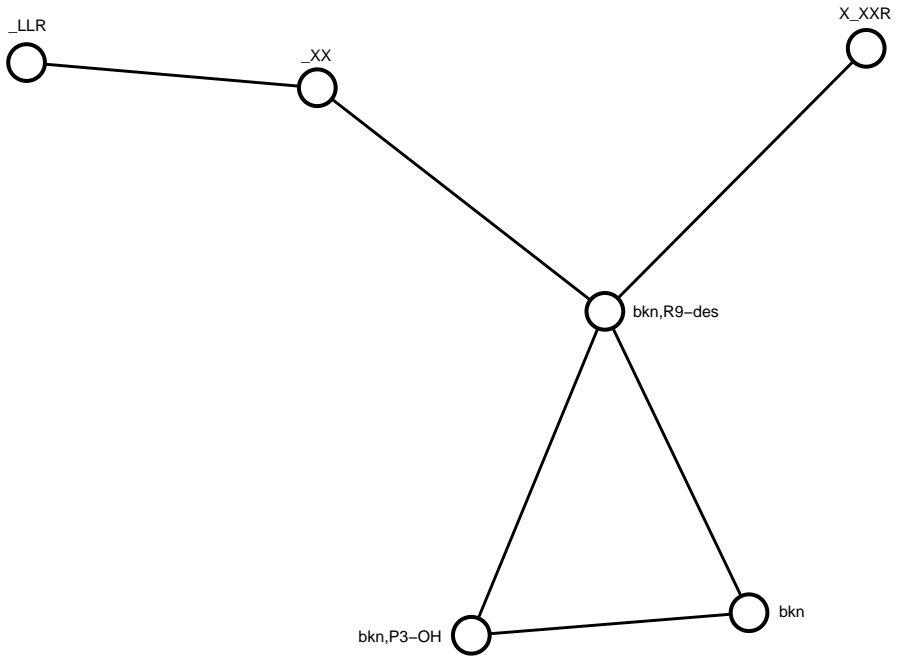

# Xanthenes (caffeine) Network

E)

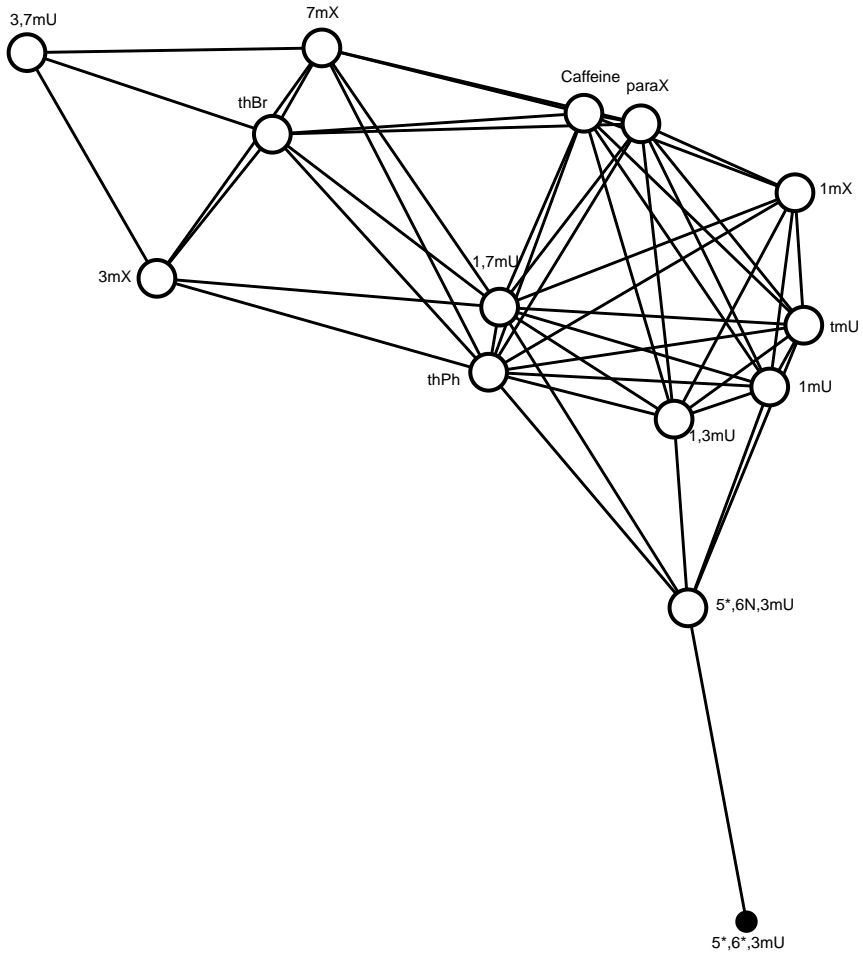

Supplement: pone.0224682.s008.pdf [file pone.0224682.s008.pdf]
